# Supplementary material for: Ruthenium complexes with an N-heterocyclic carbene NNC-pincer ligand: preparation and catalytic properties
Source: Royal Society of Chemistry journal article supplement (doi:10.1039/c5qo00137d), 2015-01-01
Supplement: c5qo00137d1.pdf [file c5qo00137d1.pdf]

## Supporting information:

### ***Ruthenium complexes with an N-heterocyclic carbene NNC-pincer ligand: preparation and catalytic properties***

Carmen Mejuto,<sup>a</sup> Marco A. García-Eleno<sup>b</sup>, Gregorio Guisado-Barrios,<sup>a\*</sup> Denis Spasyuk,<sup>c</sup> Dmitri Gusev<sup>c\*</sup> and Eduardo Peris<sup>a\*</sup>

<sup>a</sup>*Institute of Advanced Materials (INAM), Universitat Jaume I, Av. de Vicent Sos Baynat, s/n 12071. Castellón de la Plana, España.*

<sup>b</sup>*Dpto. de Química Inorgánica, Instituto de Química, Circuito Exterior s/n, Ciudad Universitaria. Delegación Coyoacan, Mexico, D.F.*

<sup>c</sup>*Dept. of Chemistry, Wilfrid Laurier University, Waterloo, Ontario N2L 3C5, Canada.*

#### **1. NMR Spectra**

1.1. <sup>1</sup>H and <sup>13</sup>C NMR spectra of **1**

1.2. <sup>1</sup>H and <sup>13</sup>C NMR spectra of **2**

1.2. <sup>1</sup>H and <sup>13</sup>C NMR spectra of **3**

1.2. <sup>1</sup>H and <sup>13</sup>C NMR spectra of **4**

#### **2. X-Ray Crystallography**

2.1 Crystal data for **2** and **4**

#### **3. Catalytic studies:**

3.1 General Procedure for the reduction of of ketones and aldehydes by transfer hydrogenation

#### **4. Bibliography**

# 1. Spectra

## 1.1. <sup>1</sup>H and <sup>13</sup>C NMR spectra of 1

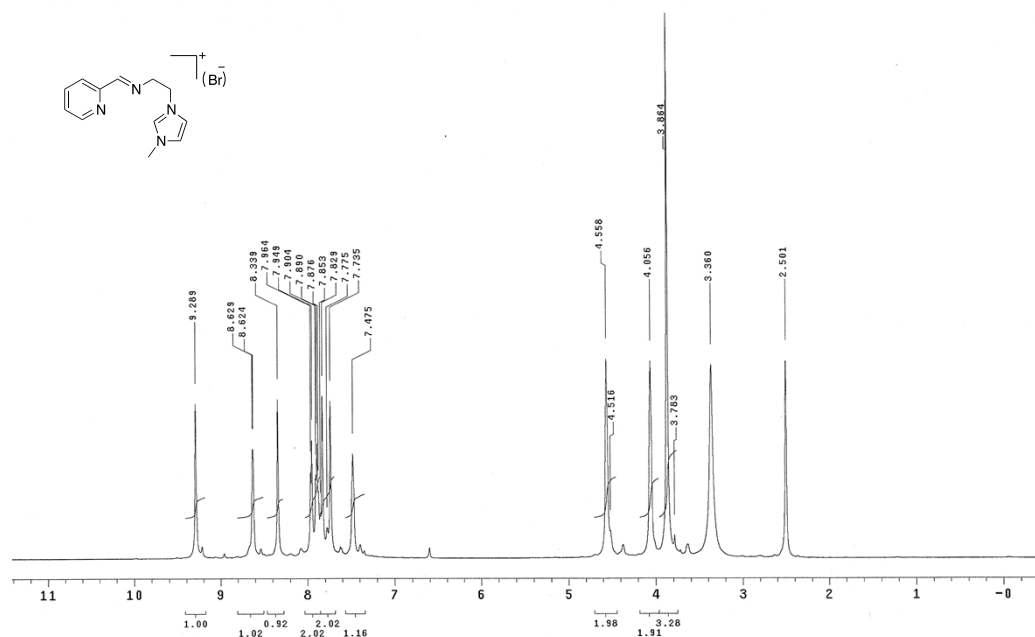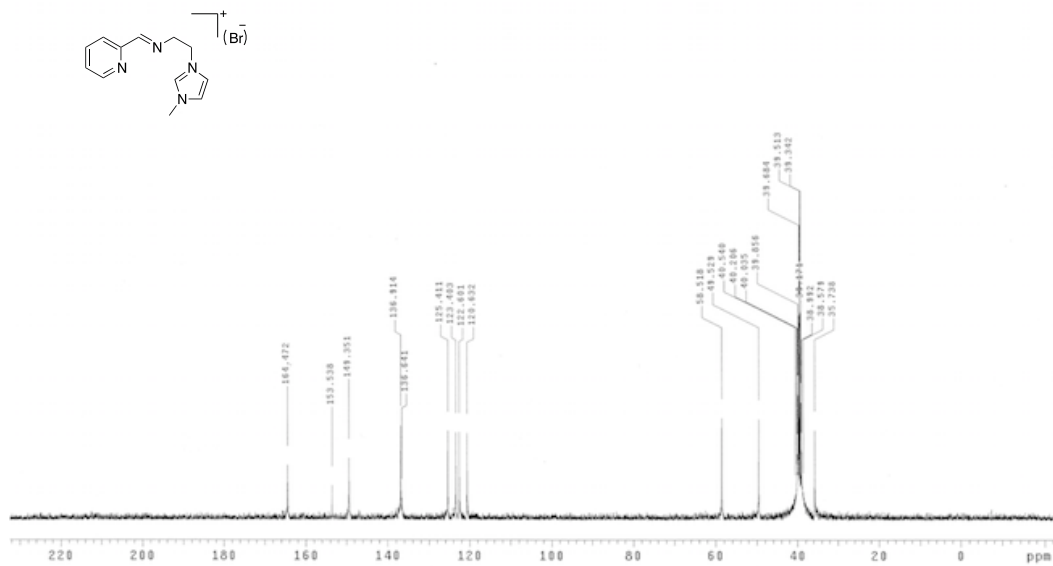

## 1.2. $^1\text{H}$ and $^{13}\text{C}$ NMR spectra of 2

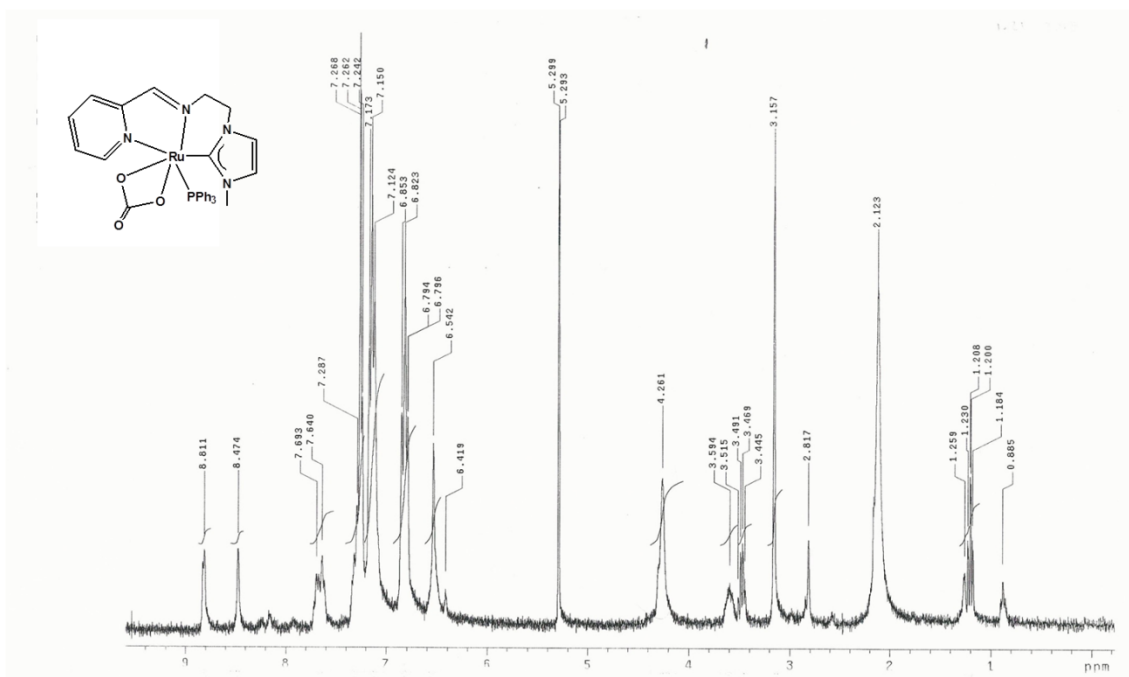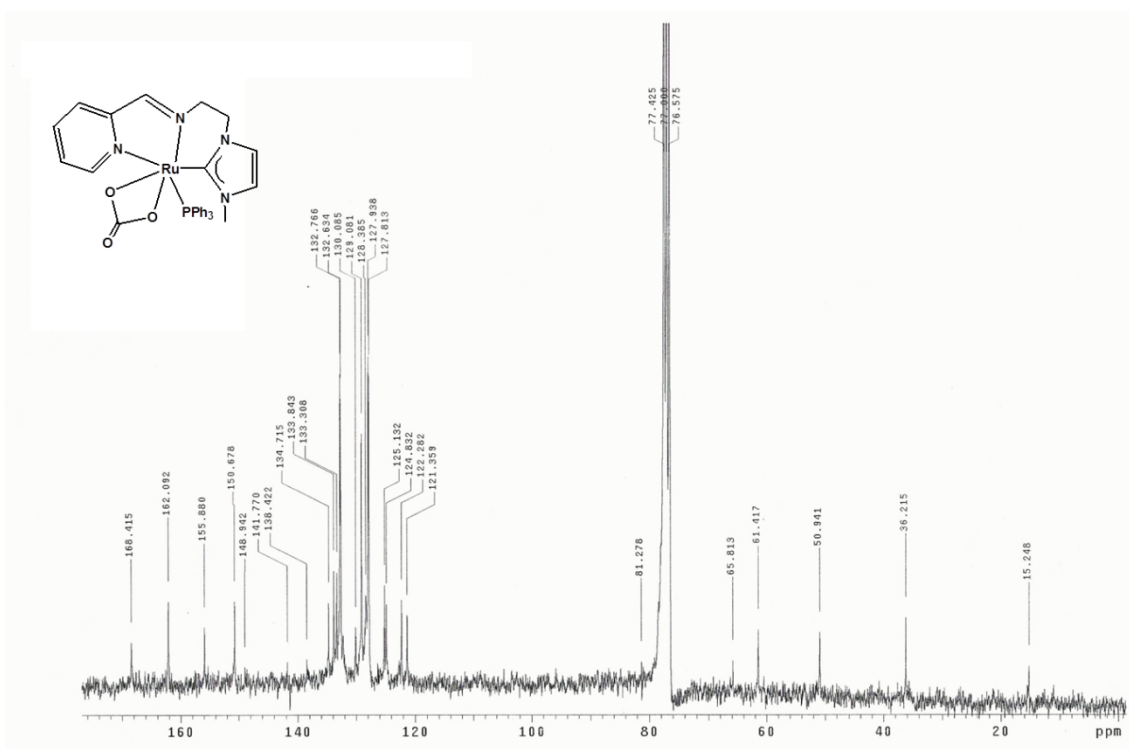

### 1.3. $^1\text{H}$ and $^{13}\text{C}$ NMR spectra of **3**

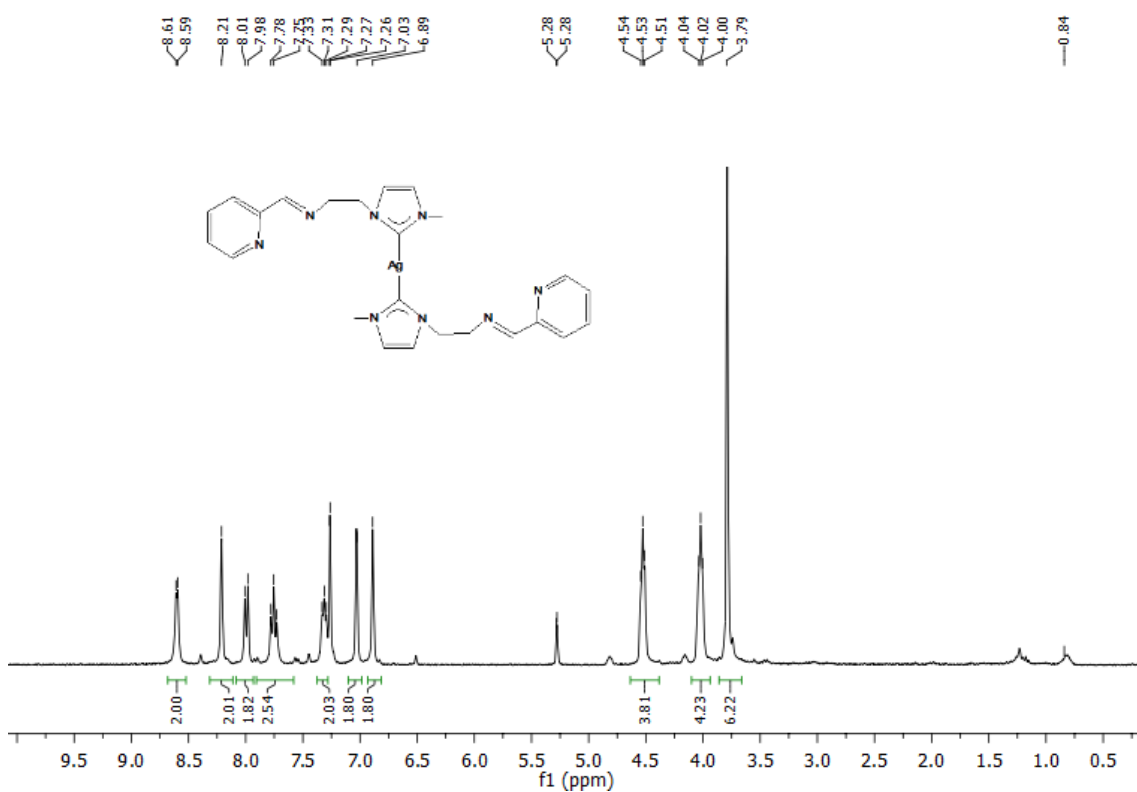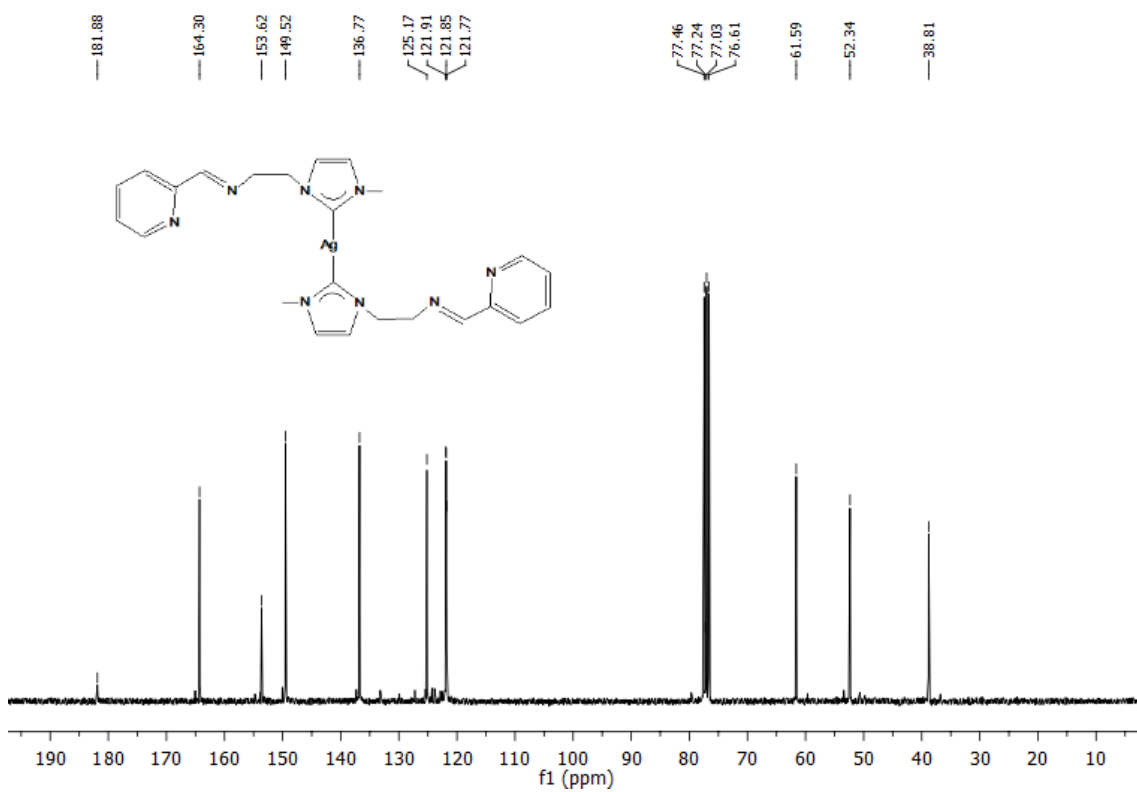

1.4.  $^1\text{H}$  and  $^{13}\text{C}$  NMR spectra of **4**

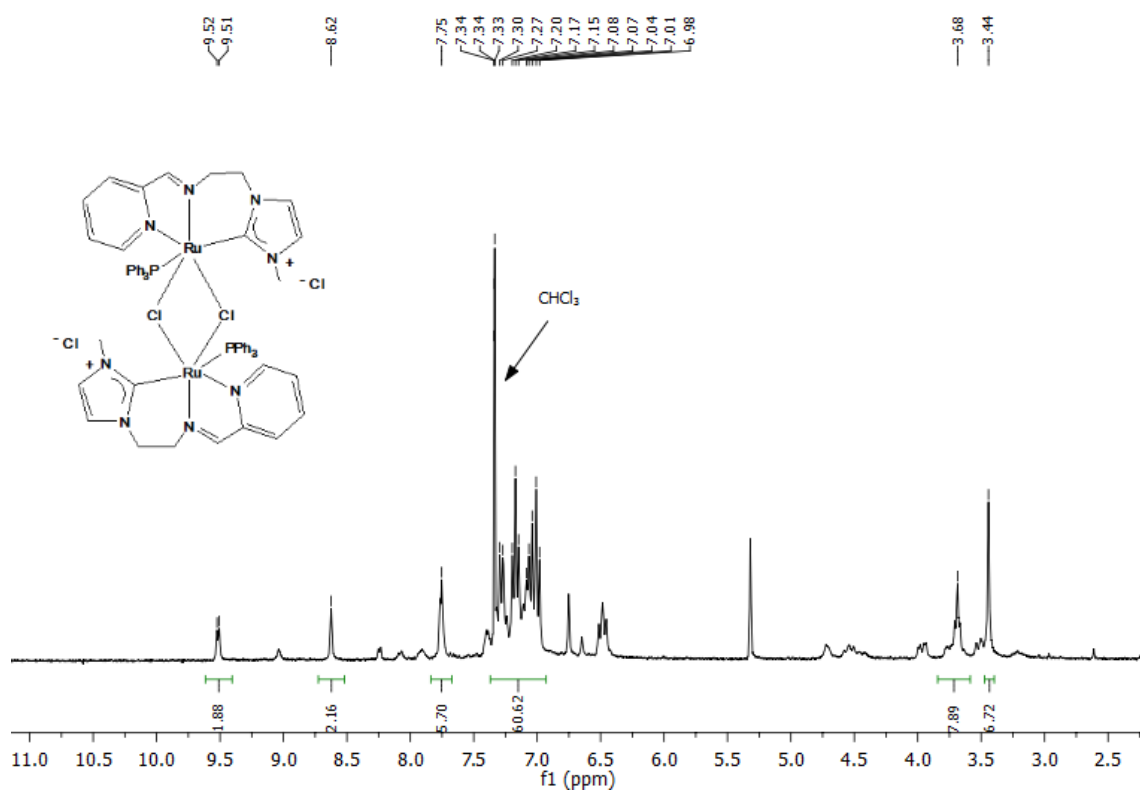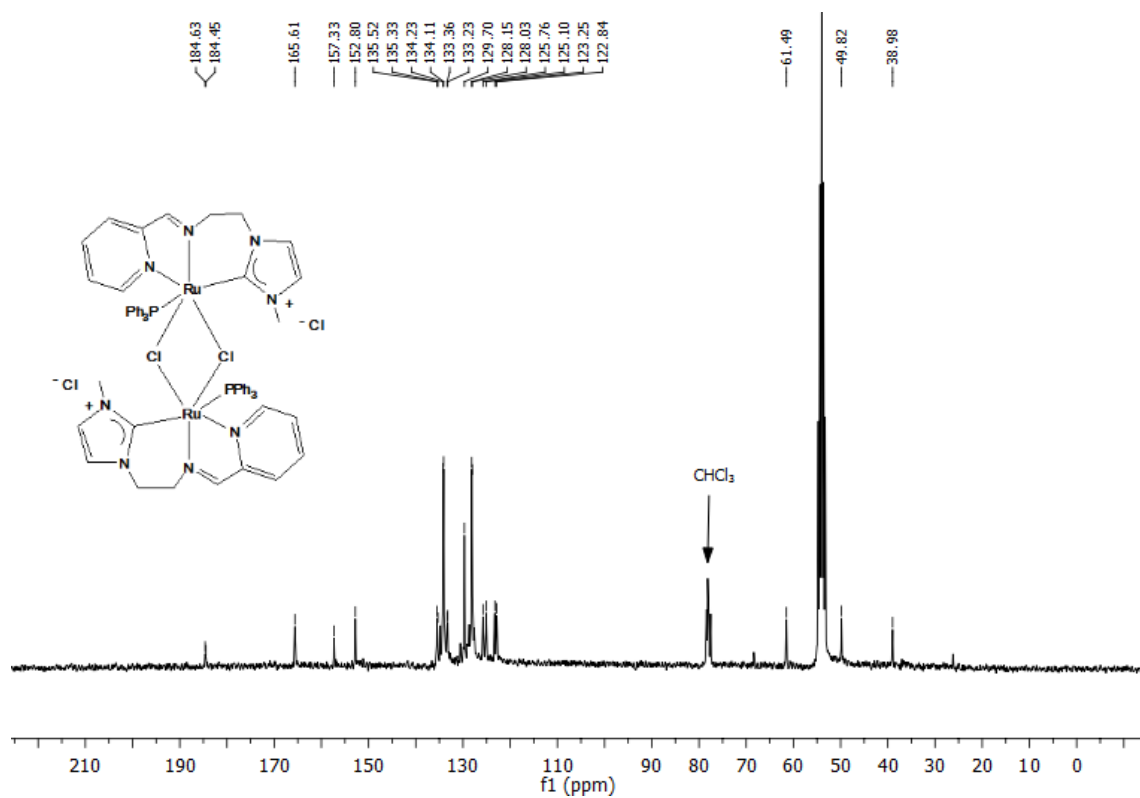

## 2. X-Ray Crystallography.

Single crystals of **2** and **4** suitable for X-ray crystallographic analysis were obtained as described above. Diffraction data were collected on a Agilent SuperNova diffractometer equipped with an Altas CCD detector using Cu K $\alpha$  radiation ( $\lambda = 1.54184 \text{ \AA}$ ). Single mounted on a MicroMount polymer tip (MiteGen) in a random orientation. The crystals were kept at 293 K during data collection for **2** and at 290 K for **4**. The structures were solved by direct methods in SHELXS-97<sup>4</sup> and refined by the full-matrix method based on  $F^2$  with the program SHELXL-97 using the OLEX software package.<sup>1-2</sup> Further crystallographic data may be found in the corresponding CIF files which were deposited at the Cambridge Crystallographic Data Centre CCDC, Cambridge, UK. The reference number for **2** and **4** were assigned as 1060997, 1060998 respectively.

### 2.1 Crystal data, data collection and structure refinement details for **2** and **4**:

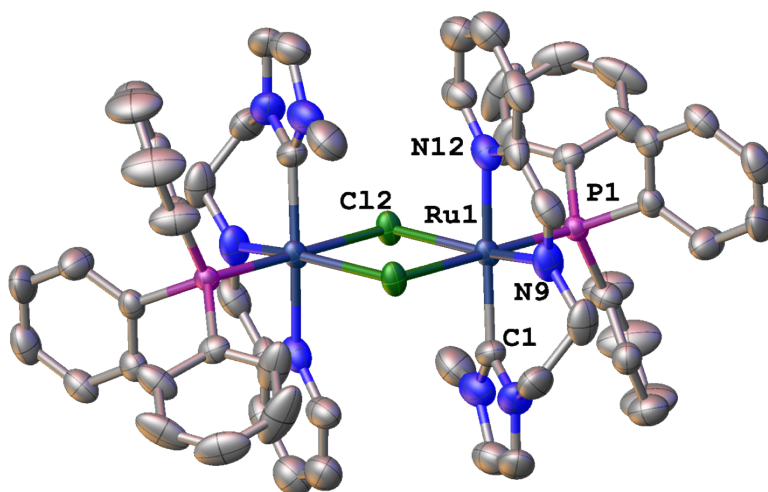

Compound **2**:  $C_{70}H_{66}Cl_{34}N_8P_2Ru_2$  ( $M = 2488.68$ ): monoclinic, space group  $P2_1/a$ ,  $a = 13.2500(2) \text{ \AA}$ ,  $b = 16.9695(3) \text{ \AA}$ ,  $c = 23.3436(4) \text{ \AA}$ ,  $\alpha = 90^\circ$ ,  $\beta = 103.9482(18)^\circ$ ,  $\gamma = 90^\circ$ ,  $V = 5093.95(17) \text{ \AA}^3$ ,  $Z = 2$ ,  $T = 293(2) \text{ K}$ ,  $\mu(\text{CuK}\alpha) = 11.254 \text{ mm}^{-1}$ ,  $D_{\text{calc}} = 1.623 \text{ g/cm}^3$ , 44887 reflections measured ( $7.38 \leq 2\theta \leq 131.968$ ), 8883 unique ( $R_{\text{int}} = 0.0512$ ,  $R_{\text{sigma}} = 0.0321$ ), which were used in all calculations. The final  $R_1$  was 0.0721 ( $I \geq 2\sigma(I)$ ) and  $wR_2$  was 0.2154 (all data).

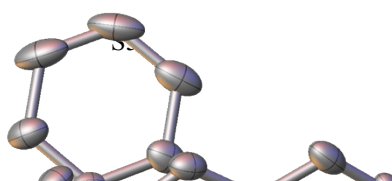

Compound 4: C<sub>32</sub>H<sub>35</sub>Cl<sub>2</sub>N<sub>4</sub>O<sub>5</sub>PRu (*M*=758.58): monoclinic, space group P2<sub>1</sub>/c, *a* = 18.2792(3)Å, *b* = 11.74106(11) Å, *c* = 17.1049(2)Å, *V* = 3259.49(9) Å<sup>3</sup>, *Z* = 4, *T* = 199.95(10) K, μ(CuKα) = 1.54184 mm<sup>-1</sup>, *D*<sub>calc</sub> = 1.546 g/mm<sup>3</sup>, 27673 reflections measured (9.296 ≤ 2Θ ≤ 139.32), 6075 unique (*R*<sub>int</sub> = 0.0499, *R*<sub>sigma</sub> = 0.0291) which were used in all calculations. The final *R*<sub>1</sub> was 0.2354 (*I* > 2σ(*I*)) and *wR*<sub>2</sub> was 0.5147 (all data).

### 3. Catalytic studies: transfer hydrogenation.

#### 3.1. General Procedure for the reduction of ketones and aldehydes by transfer hydrogenation.

In a 50 mL high-pressure Schlenk tube, ketone (1 mmol), catalyst (0.5 mol %), Base (0.1 mmol) and *i*PrOH (3 mL) were placed. The mixture was stirred and heated to 85 °C for 1h. The reaction yields were calculated by GC or <sup>1</sup>H NMR using Anisole as internal standard.

### 4. Bibliography

1. Dolomanov, O.V., Bourhis, L.J., Gildea, R.J, Howard, J.A.K. & Puschmann, H. (2009), *J. Appl. Cryst.* 42, 339-341.
2. Sheldrick, G.M. (2008). *Acta Cryst.* A64, 112-122.
